# Supplementary material
Source: Springer Nature journal article supplement (https://www.springermedizin.de/resource/supplementary/12993_2007_113_MOESM2_ESM.pdf/9617102)

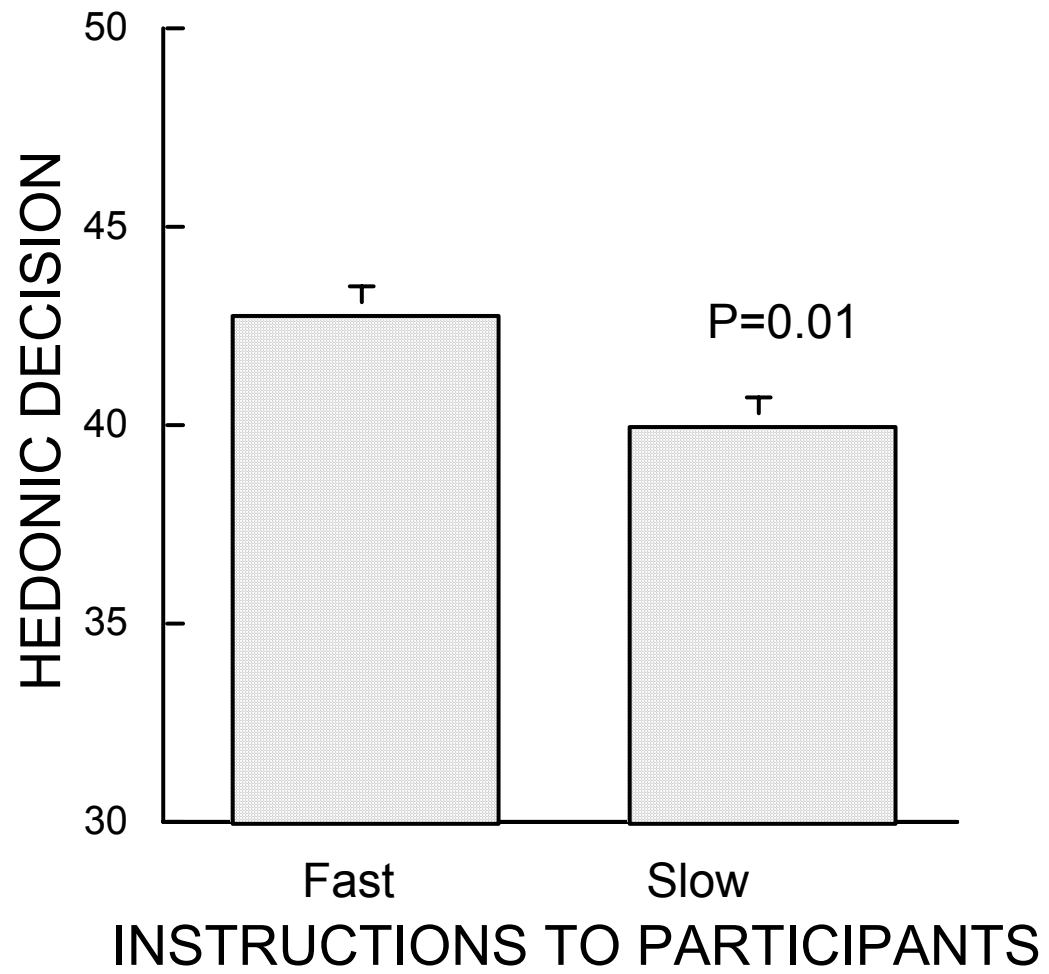

Supplement: MOESM2 [file 9617102]
